# Supplementary material for: Surface Property Modification of Silver Nanoparticles with Dopamine-Functionalized Poly(pentafluorostyrene) via RAFT Polymerization
Source: PubMed Central journal article supplement (PMC6432553; doi:10.3390/polym8030081), 2016-03-14
Supplement: polymers-08-00081-s001.pdf [file polymers-08-00081-s001.pdf]

# Supplementary Materials: Surface Property Modification of Silver Nanoparticles with Dopamine-Functionalized Poly(pentafluorostyrene) via RAFT Polymerization

Ka Wai Fan and Anthony Michael Granville

Table S1. DLS measurement of AgNPs synthesized via MCR.

| Sample name           | Z-Average size (d. nm) | PDI   | Peak (d. nm) | % Number |
|-----------------------|------------------------|-------|--------------|----------|
| AgNPs (MCR)—3rd Batch | 49                     | 0.424 | 10           | 100.0    |
| AgNPs (MCR)—2nd Batch | 38                     | 0.462 | 10           | 100.0    |
| AgNPs (MCR)—1st Batch | 22                     | 0.550 | 5            | 100.0    |

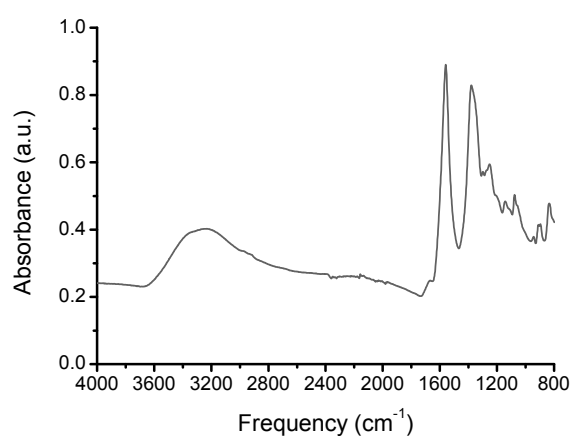

Figure S1. ATR-FTIR spectrum of AgNPs synthesized via the MCT method.

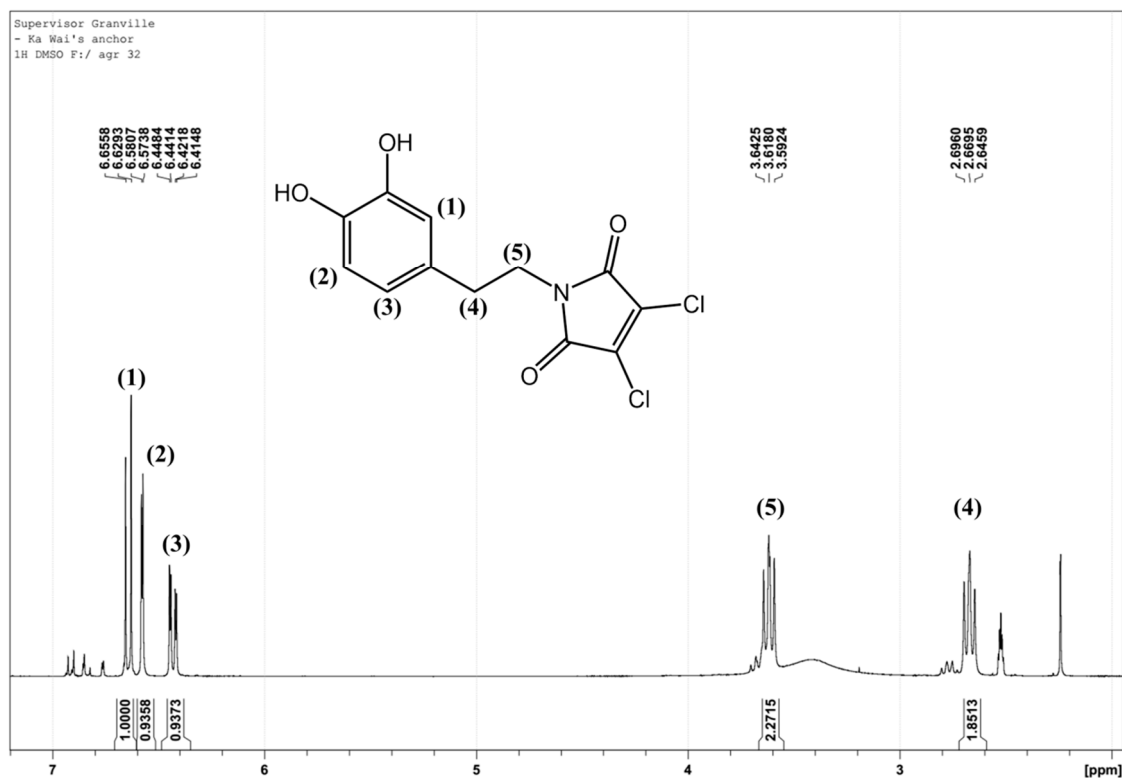

Figure S2. <sup>1</sup>H NMR spectrum of the DA-DCMA anchor (in deuterated DMSO).

**Table S2.** Summary of  $^1\text{H}$  NMR results of the DA-DCMA anchor.

| Peak ( $\delta$ ppm) | Multiplicity | Structure     | Proton integration |
|----------------------|--------------|---------------|--------------------|
| 6.63                 |              |               | 1                  |
| 6.57                 | Multiplet    | CH (Aromatic) | 1                  |
| 6.43                 |              |               | 1                  |
| 3.62                 | Triplet      | $\text{CH}_2$ | 2                  |
| 2.67                 | Triplet      | $\text{CH}_2$ | 2                  |

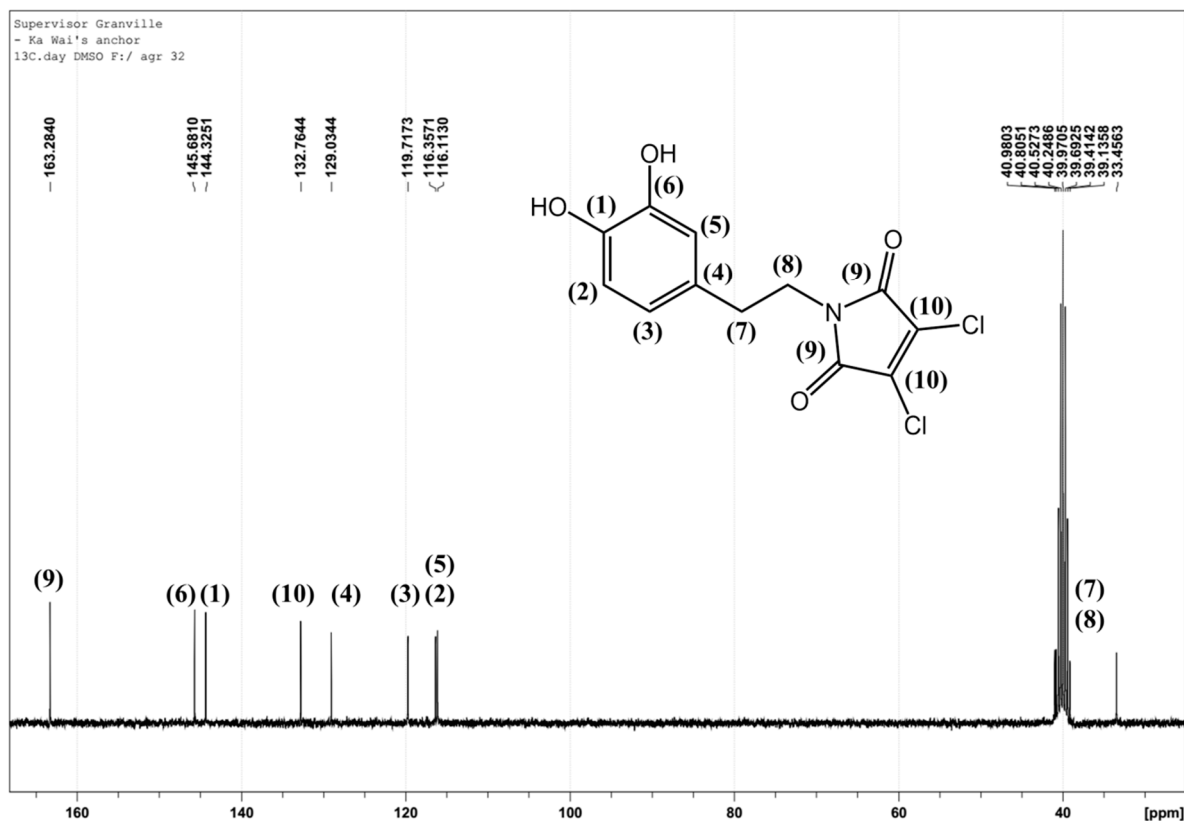**Figure S3.**  $^{13}\text{C}$  NMR spectrum of the DA-DCMA anchor (in deuterated DMSO).**Table S3.** Summary of  $^{13}\text{C}$  NMR results of the DA-DCMA anchor.

| Peak ( $\delta$ ppm) | Structure                       | Carbon integration |
|----------------------|---------------------------------|--------------------|
| 163.28               | $\text{N}-\text{C}=\text{O}$    | 2                  |
| 145.68               | $\text{C}-\text{OH}$ (Aromatic) | 1                  |
| 144.32               | $\text{C}-\text{OH}$ (Aromatic) | 1                  |
| 132.76               | $=\text{C}-\text{Cl}$           | 2                  |
| 129.03               | C (Aromatic)                    | 1                  |
| 119.72               | CH (Aromatic)                   | 1                  |
| 116.35               | CH (Aromatic)                   | 1                  |
| 116.11               | CH (Aromatic)                   | 1                  |

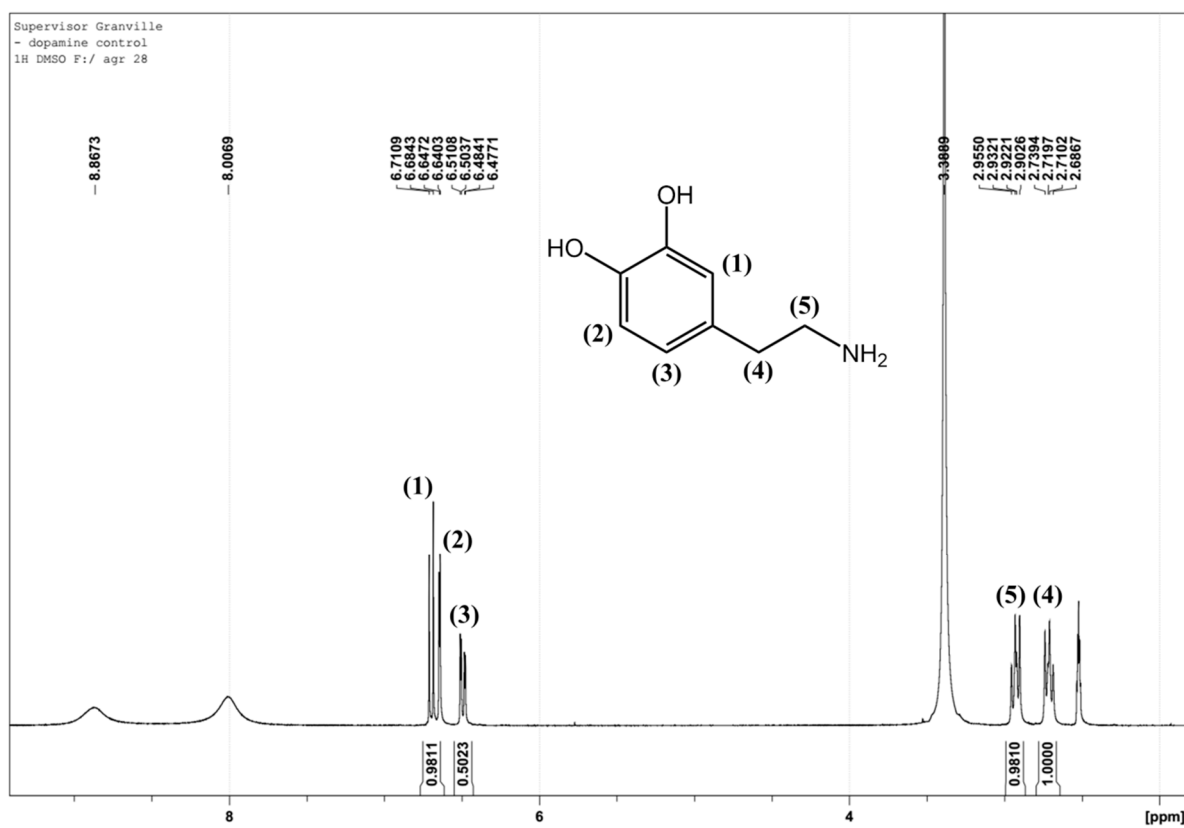

Figure S4. <sup>1</sup>H NMR spectrum of dopamine (in deuterated DMSO).

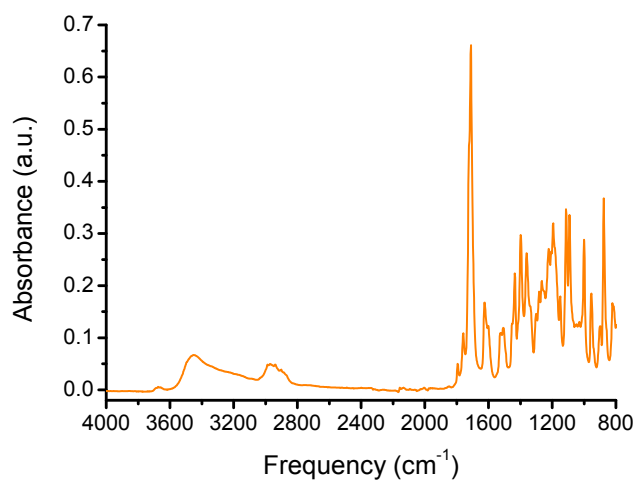

Figure S5. ATR-FTIR spectrum of the DA-DCMA anchor.

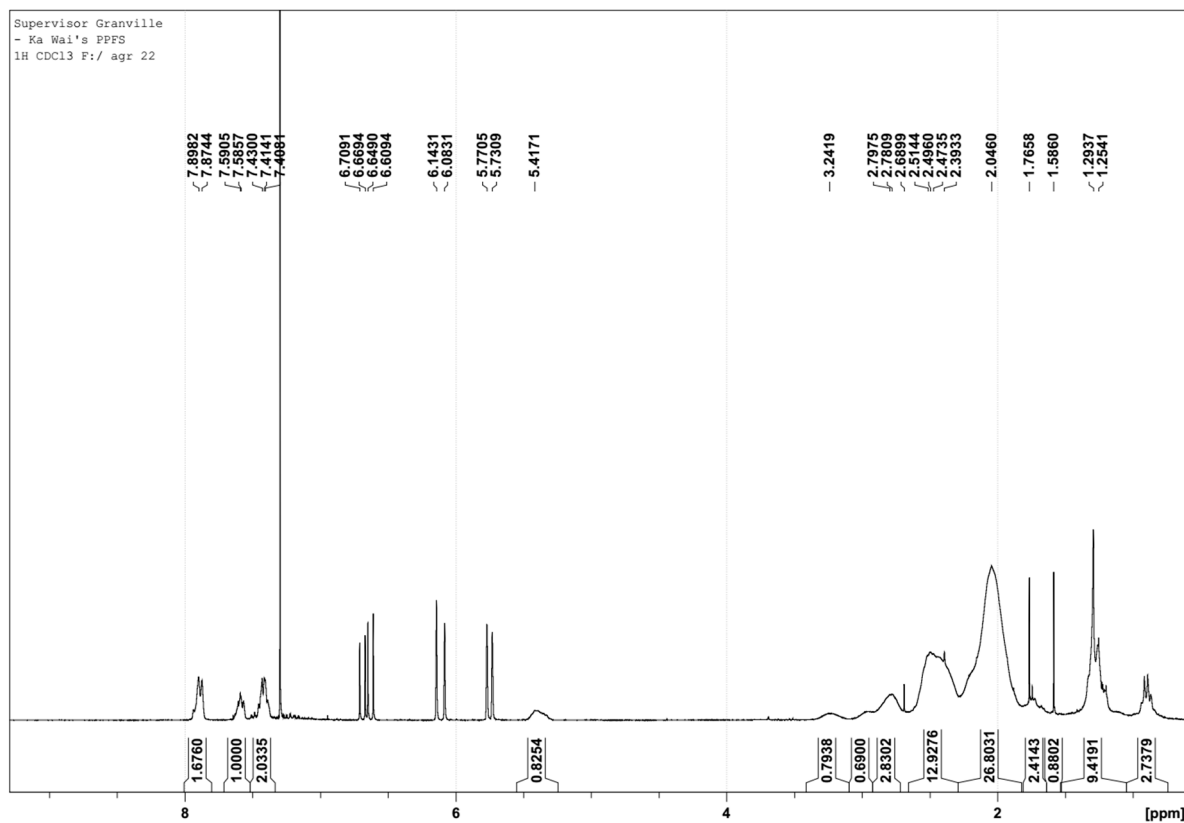

Figure S6.  $^1\text{H}$  NMR spectrum of the synthesized PPFS (in deuterated chloroform).

Table S4. Summary of  $^1\text{H}$  NMR results of PPFS.

| Peak ( $\delta$ ppm) | Multiplicity   | Structure                  | Proton integration |
|----------------------|----------------|----------------------------|--------------------|
| 7.88                 |                |                            | 2                  |
| 7.59                 | Multiplet      | CH (Aromatic-CPADB)        | 1                  |
| 7.71                 |                |                            | 2                  |
| 2.50                 | (Broad signal) | CH (Backbone)              | 13                 |
| 2.05                 | (Broad signal) | CH <sub>2</sub> (Backbone) | 27                 |

Table S5. GPC results of PPFS samples.

| Sample status | PPFS (Supplied batch)                    |           |
|---------------|------------------------------------------|-----------|
|               | $M_w$ ( $\text{g}\cdot\text{mol}^{-1}$ ) | $\bar{D}$ |
| Non-modified  | 4,394                                    | 1.13569   |
| Reduced       | 7,547                                    | 1.15345   |
| Coupled       | 7,891                                    | 1.22284   |

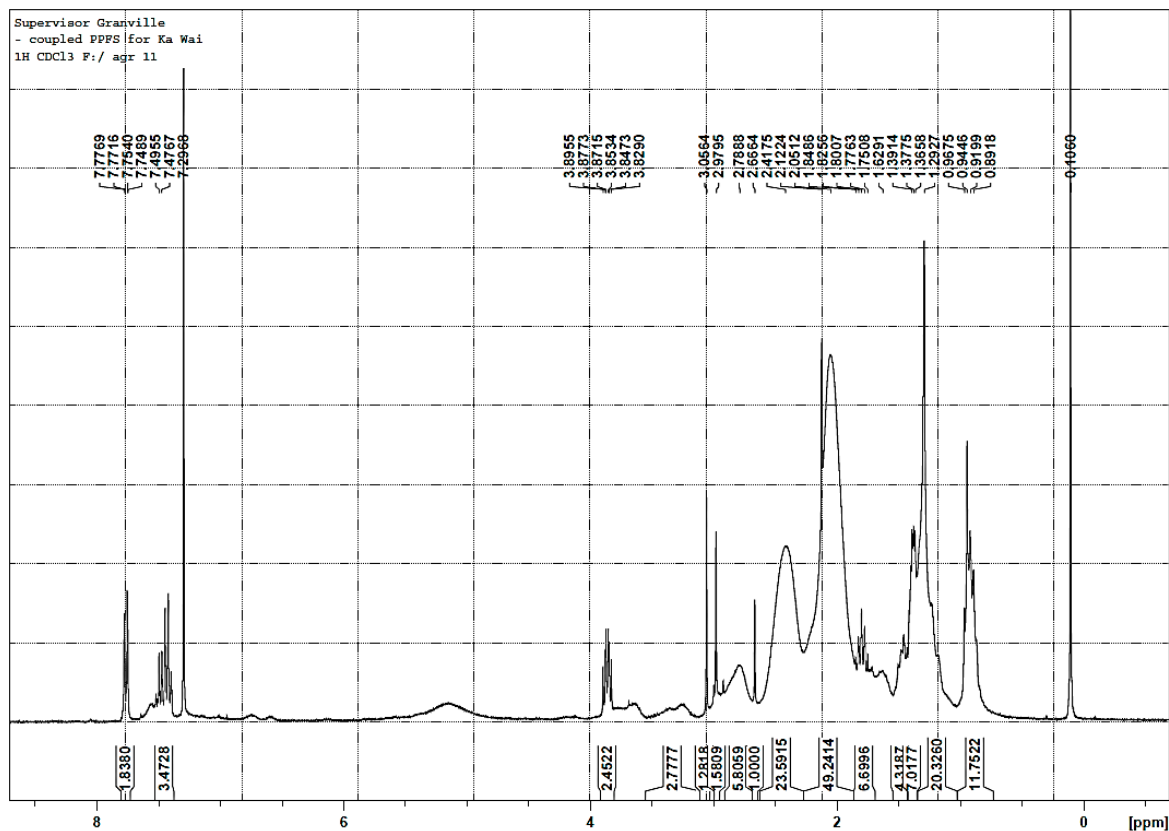

Figure S7. <sup>1</sup>H NMR spectrum of the coupled PPFS (in deuterated chloroform).

Table S5. Peak summary of <sup>1</sup>H NMR results of the coupled PPFS.

| Peak ( $\delta$ ppm) | Multiplicity   | Structure                  | Proton integration |
|----------------------|----------------|----------------------------|--------------------|
| 2.42                 | (Broad signal) | CH (Backbone)              | 24                 |
| 2.05                 | (Broad signal) | CH <sub>2</sub> (Backbone) | 49                 |

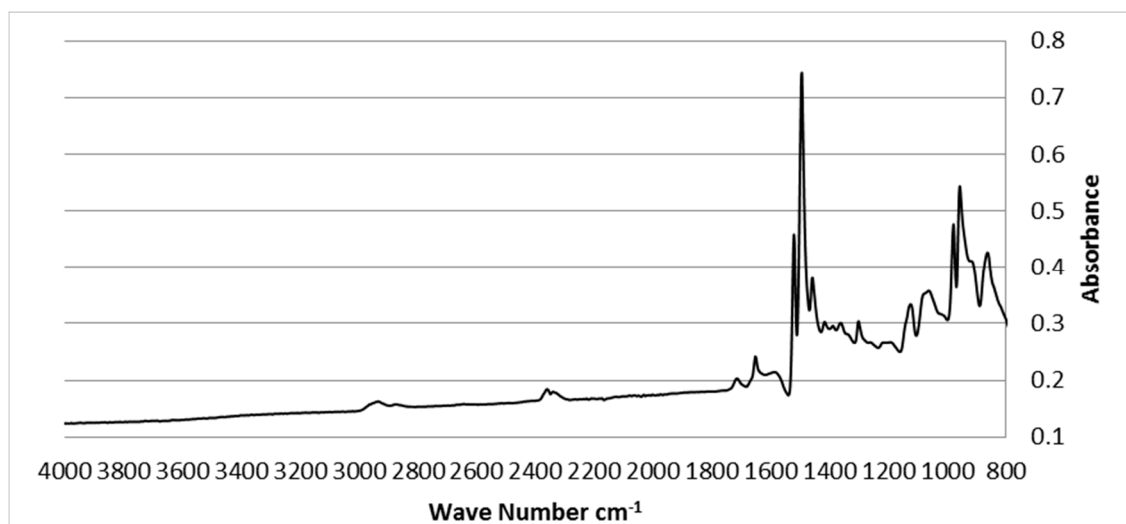

Figure S8. ATR-FTIR spectrum of the purified PPFS-AgNPs.

Table S7. DLS measurement of the prepared PPFS-AgNPs.

| Sample name                                           | Dispersant | Z-Average size (d. nm) | PDI   | Peak (d. nm) | % Volume |
|-------------------------------------------------------|------------|------------------------|-------|--------------|----------|
| PPFS-AgNPs 1st Batch<br>(From 2nd Batch of MCR AgNPs) | Water      | 932                    | 0.494 | 1,179        | 87.7%    |
|                                                       |            |                        |       | 4,910        | 10.3%    |
|                                                       |            |                        |       | 182          | 2.0%     |
| PPFS-AgNPs 1st Batch<br>(From 2nd Batch of MCR AgNPs) | THF        | 168                    | 0.581 | 297          | 32.3%    |
|                                                       |            |                        |       | 80           | 43.6%    |
|                                                       |            |                        |       | 1,451        | 21.1%    |
|                                                       |            |                        |       | 21           | 66.4%    |
| PPFS-AgNPs 2nd Batch<br>(From 3rd Batch of MCR AgNPs) | THF        | 121                    | 0.356 | 133          | 30.7%    |
|                                                       |            |                        |       | 1,651        | 1.2%     |
|                                                       |            |                        |       |              |          |

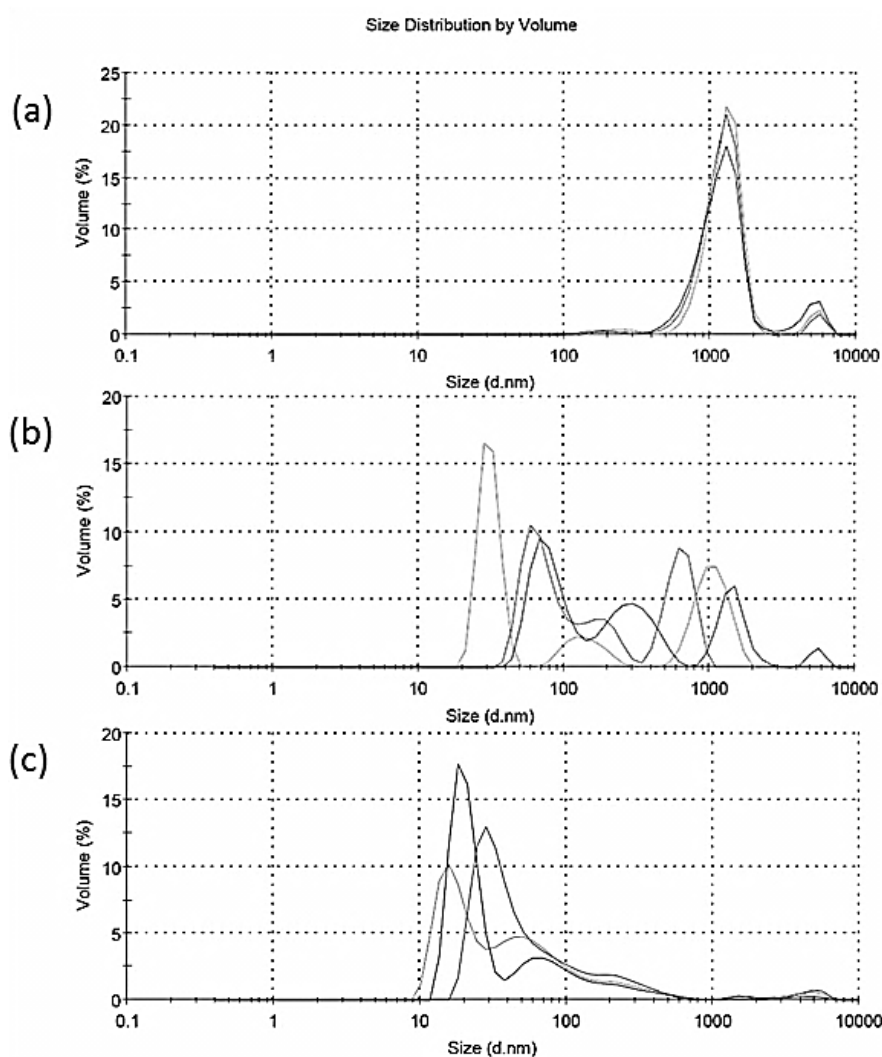

Figure S9. Particle size distribution of PPFS-AgNPs in different dispersants: (a) PPFS-AgNPs 1st Batch (in water); (b) PPFS-AgNPs 1st Batch (in THF); (c) PPFS-AgNPs 2nd Batch (in THF).

**Table S6.** Determination of the grafting density of the coupled PPFS on AgNPs.

| Terms for determining grafting density                        | PPFS-AgNPs 2nd Batch                 |         |
|---------------------------------------------------------------|--------------------------------------|---------|
| Sample Mass (mg)                                              | 1.117                                |         |
| Molecular Weight of PPFS ( $\text{mg}\cdot\text{mmol}^{-1}$ ) | 4,510                                |         |
| Diameter of AgNP Core (nm)                                    | 49.38                                |         |
| Volume of AgNP Core ( $\text{nm}^3$ )                         | 63,045                               |         |
| Surface Area of AgNP Core ( $\text{nm}^2$ )                   | 7,660                                |         |
| Density of Silver ( $\text{g}\cdot\text{cm}^{-3}$ )           | 10.5                                 |         |
| Mass of AgNP (mg)                                             | $6.62 \times 10^{-13}$               |         |
| % AgNPs in Sample                                             | 34.12%                               |         |
| % PPFS in Sample                                              | 65.88%                               |         |
| Mass of AgNPs in Sample (mg)                                  | 0.3811                               |         |
| Mass of PPFS in Sample (mg)                                   | 0.7359                               |         |
| No. of particle in Sample                                     | $5.76 \times 10^{11}$                |         |
| Mole. of PPFS chain in Sample (mmol)                          | $1.63 \times 10^{-4}$                |         |
| Avogadro's Number                                             | $6.02 \times 10^{23}$                |         |
| No. of PPFS Chains in Sample                                  | $9.83 \times 10^{16}$                |         |
| Grafting Density                                              | No. of PPFS Chains per NP            | 170,671 |
|                                                               | No. of PPFS Chains per $\text{nm}^2$ | 22      |

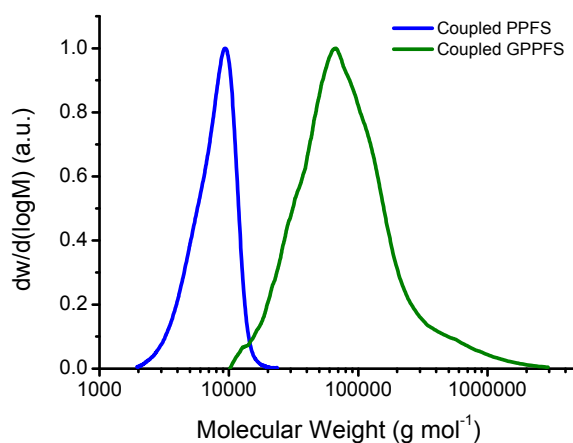**Figure S10.** Comparison of molecular weight distribution between GPPFS and coupled PPFS.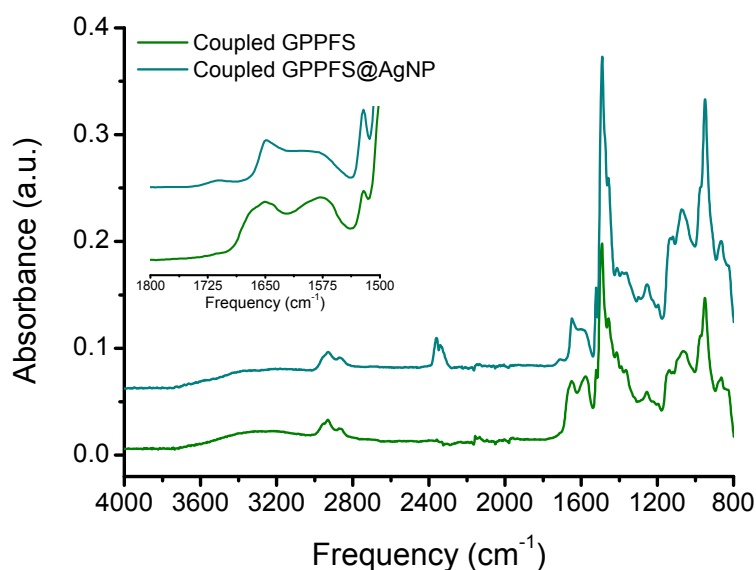**Figure S11.** ATR-FTIR spectrum of the isolated product from glycosylation of the coupled PPFS.

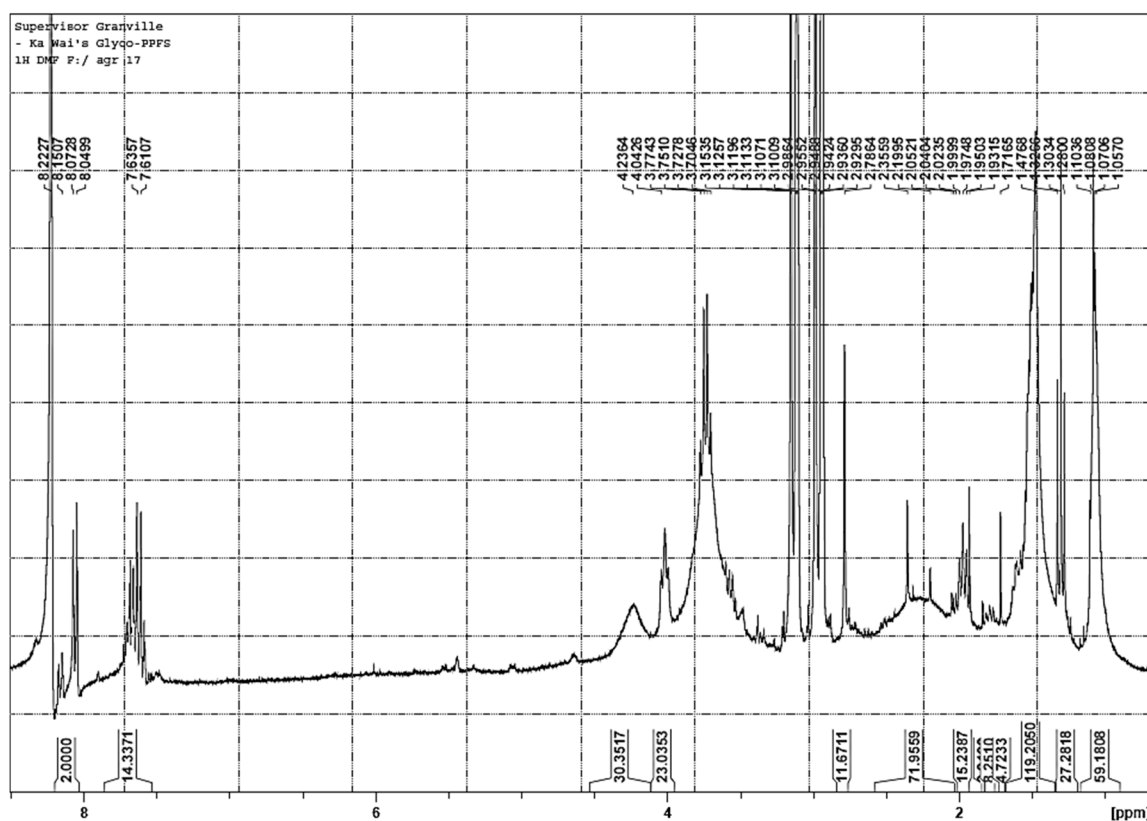

Figure S12. <sup>1</sup>H NMR spectrum of the isolated product from glycosylation of the coupled PPFS (in deuterated DMF).

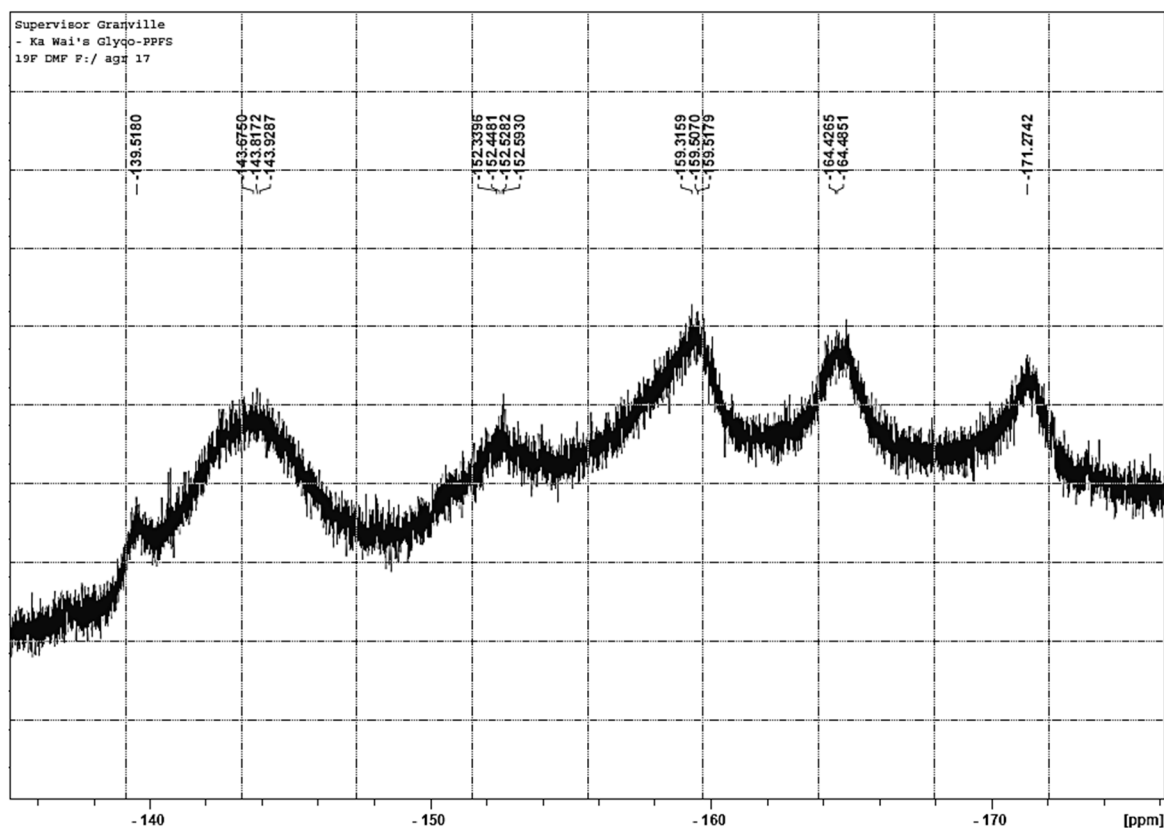

Figure S13. <sup>19</sup>F NMR spectrum of the isolated product from glycosylation of the coupled PPFS (in deuterated DMF).



**Table S7.** Summary of  $^{19}\text{F}$  NMR result of the isolated product from glycosylation of the coupled PPFS.

| Peak ( $\delta$ ppm) | Structure              | Origin |
|----------------------|------------------------|--------|
| -139.52              | Broad signal (ortho-F) | GPPFS  |
| -143.82              | Broad signal (ortho-F) | PPFS   |
| -159.50              | Broad signal (para-F)  | PPFS   |
| -164.45              | Broad signal (meta-F)  | PPFS   |

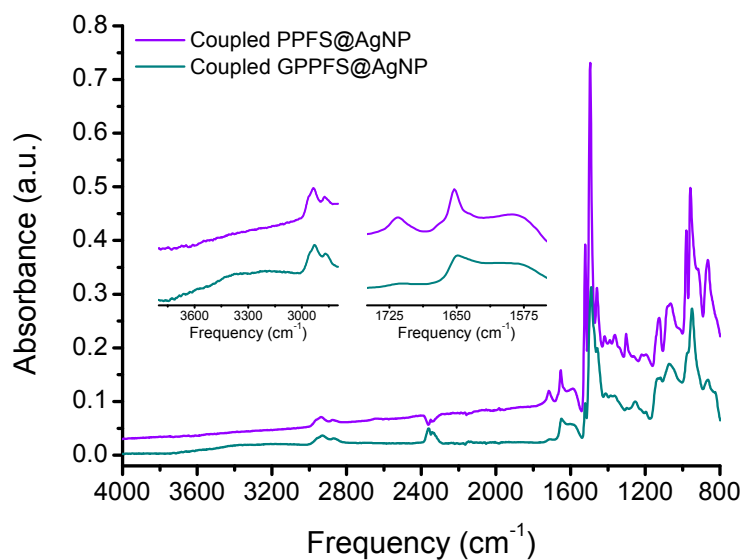**Figure S14.** ATR-FTIR spectrum of GPPFS-AgNPs.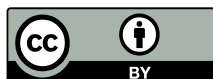

© 2016 by the authors; licensee MDPI, Basel, Switzerland. This article is an open access article distributed under the terms and conditions of the Creative Commons by Attribution (CC-BY) license (<http://creativecommons.org/licenses/by/4.0/>).
